# Supplementary material for: Comparative genomic analysis of uropathogenic Escherichia coli strains from women with recurrent urinary tract infection
Source: Frontiers journal article supplement (doi:10.3389/fmicb.2023.1340427), 2024-01-24
Supplement: Data_Sheet_1.zip [file Data_Sheet_1.zip]

Timeline of evolution of RUTIs in patients

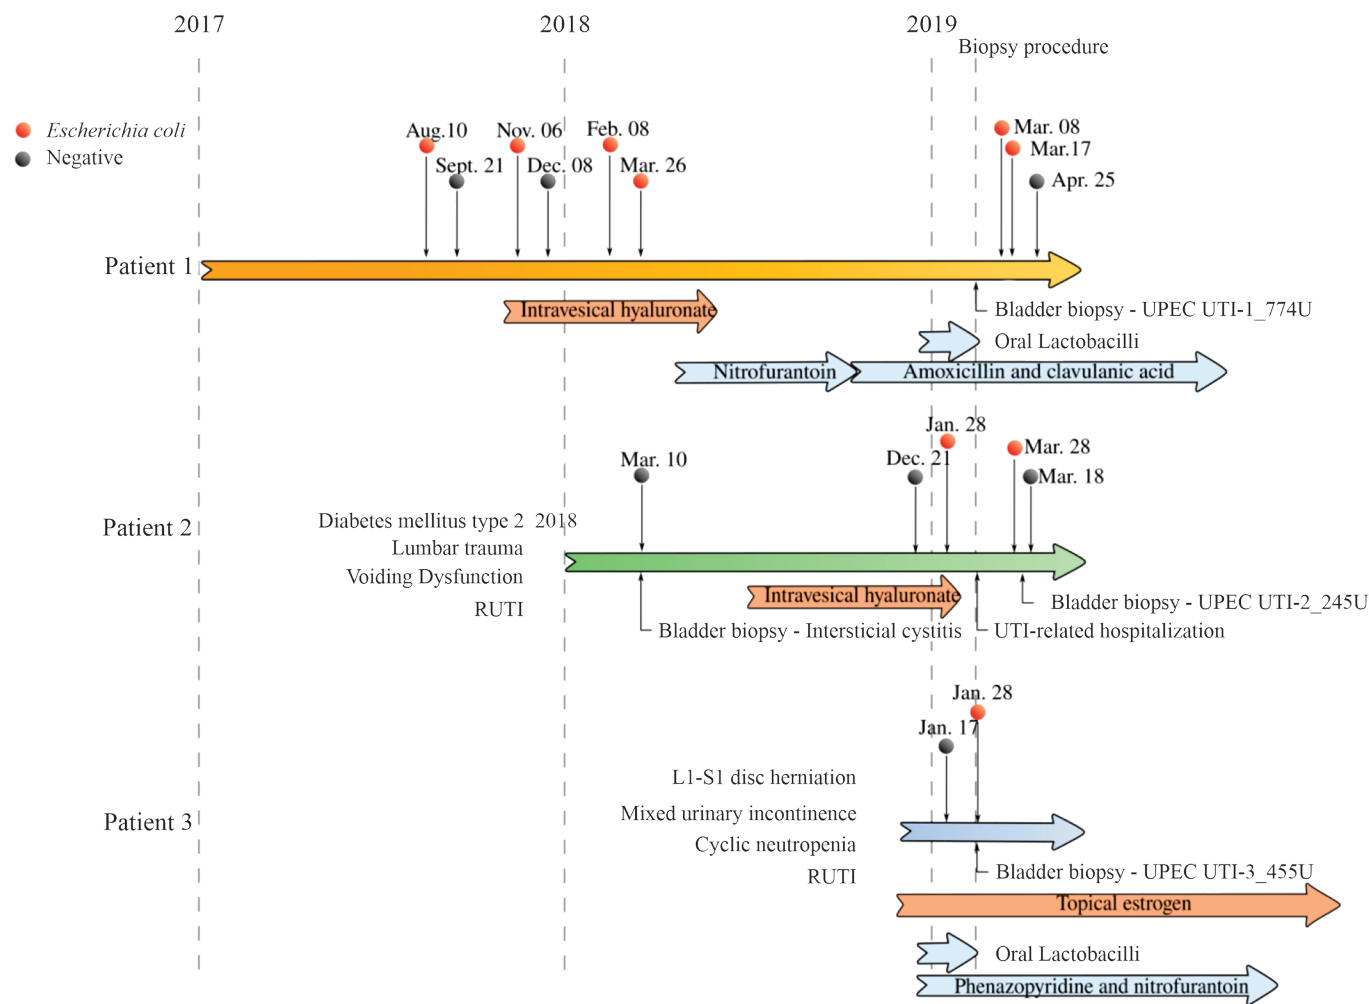

### Hemolytic activity of RUTI-associated UPEC strains

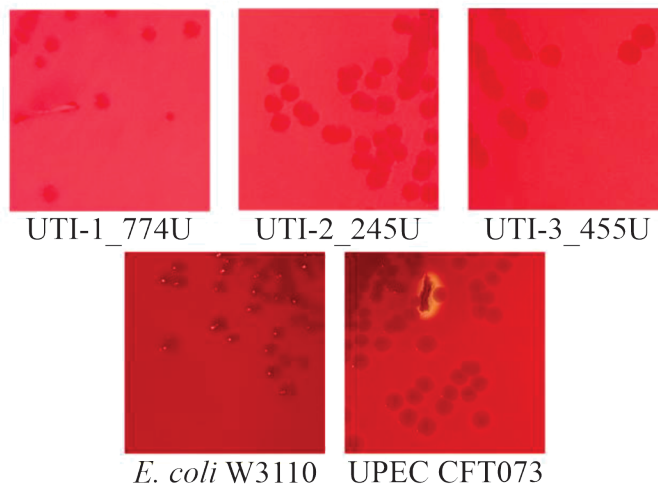

# Biofilm Production

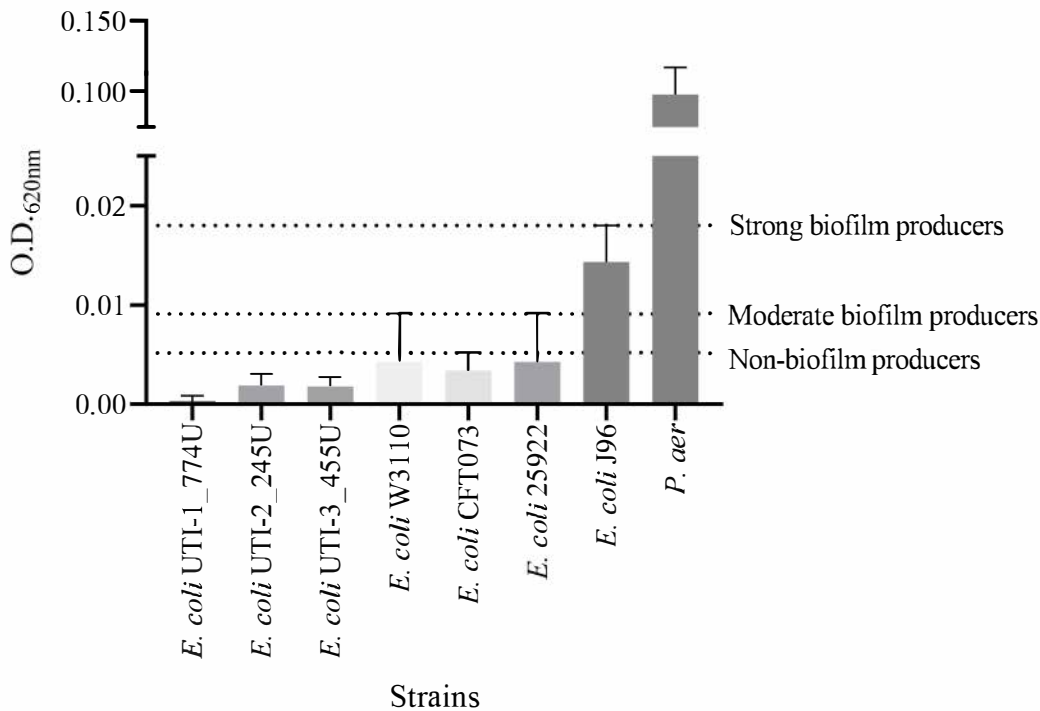

# CFT073 Pathogenicity Islands Loss in RUTIs

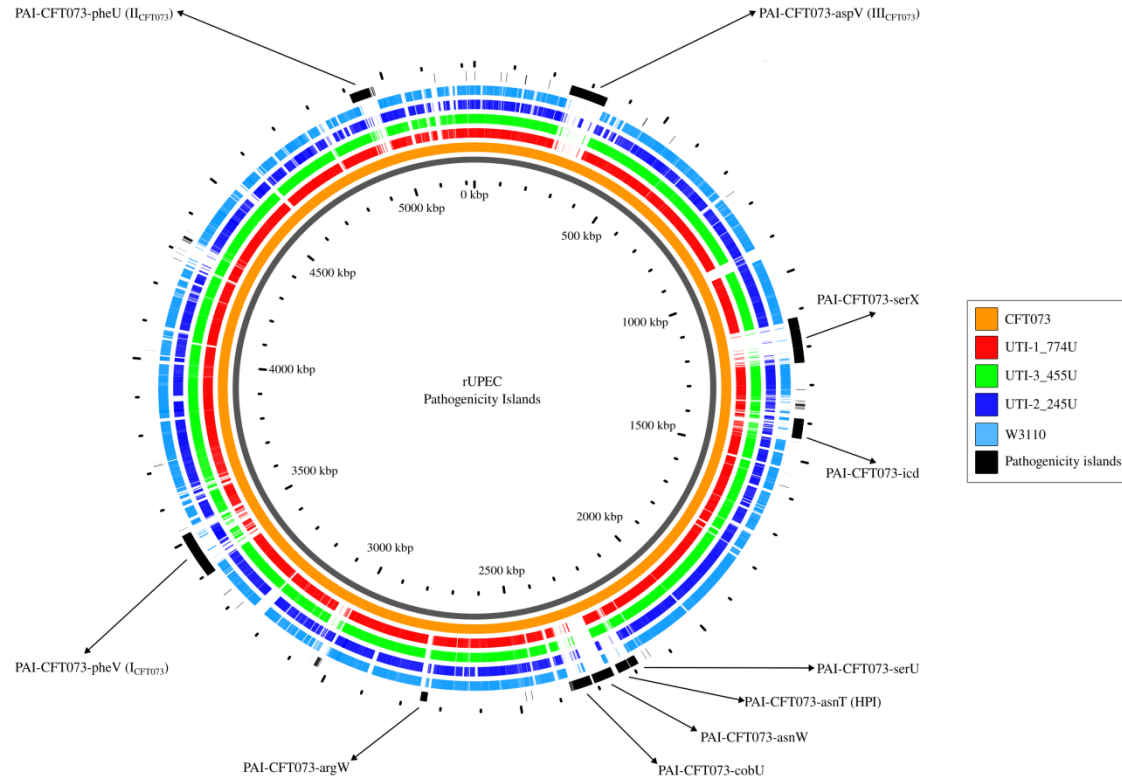

# Plasmids in RUTIs strains

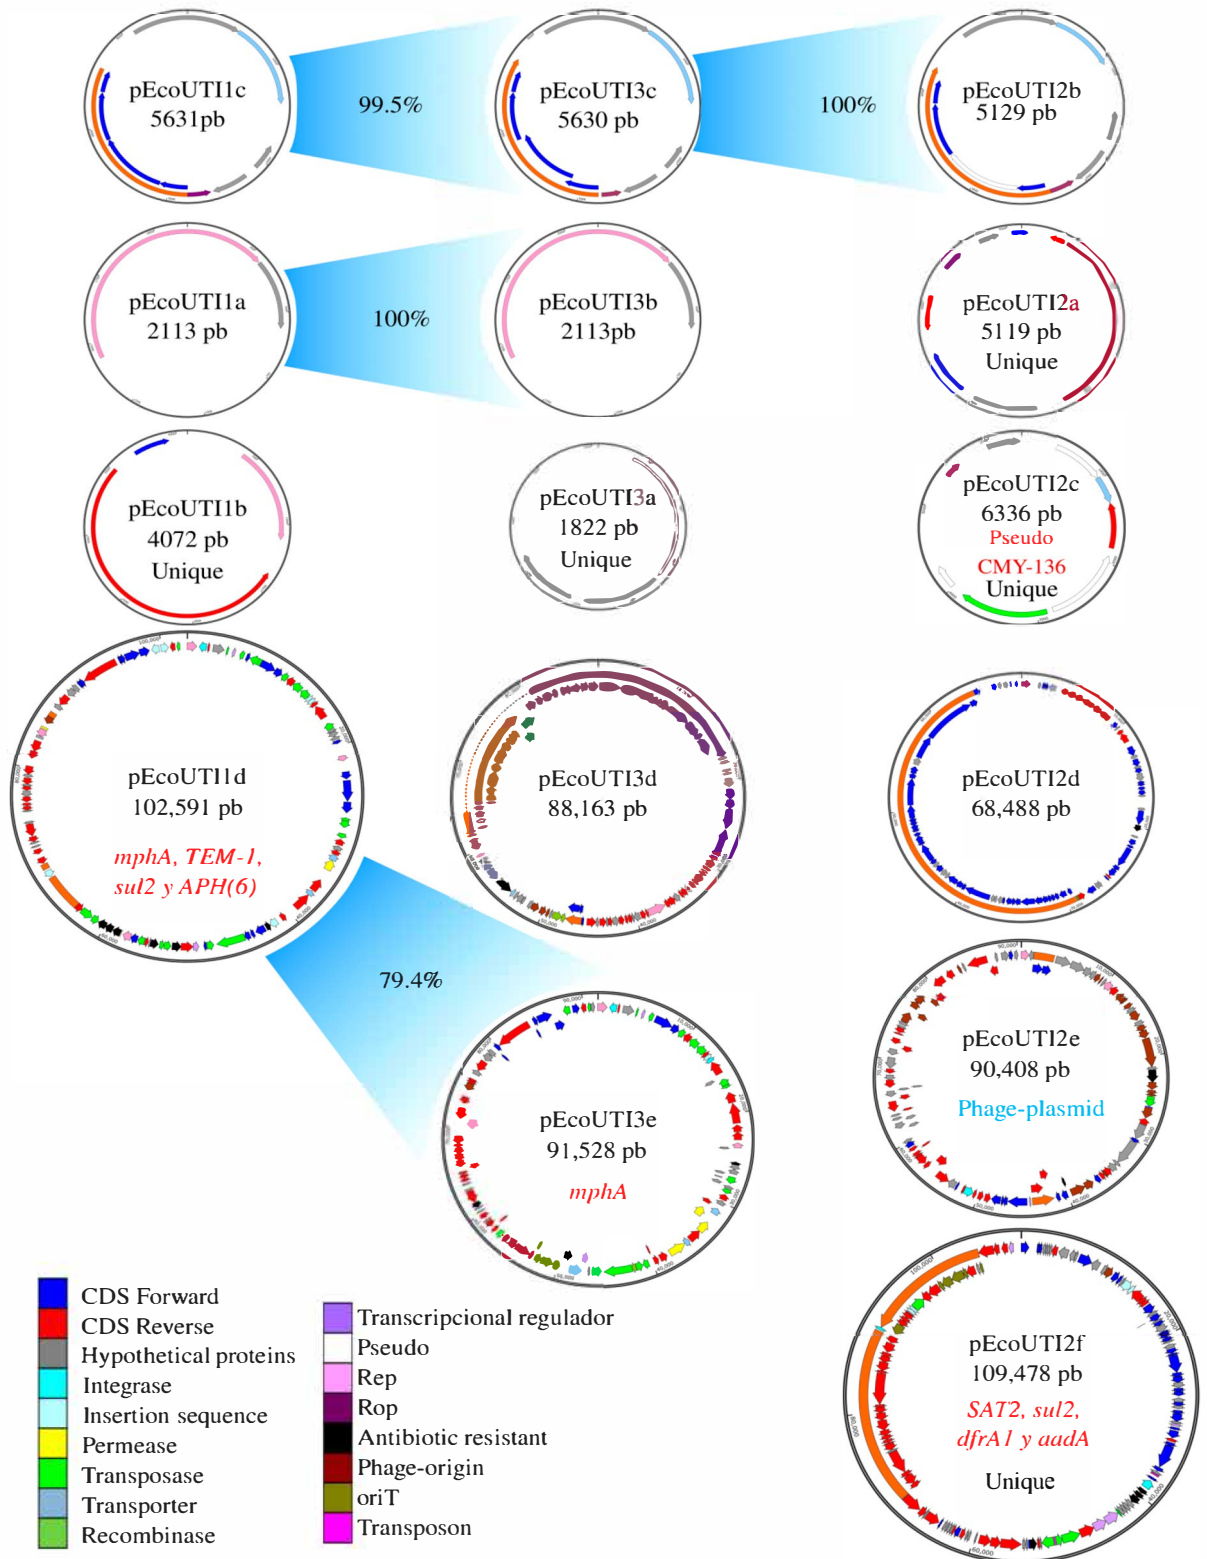

A)

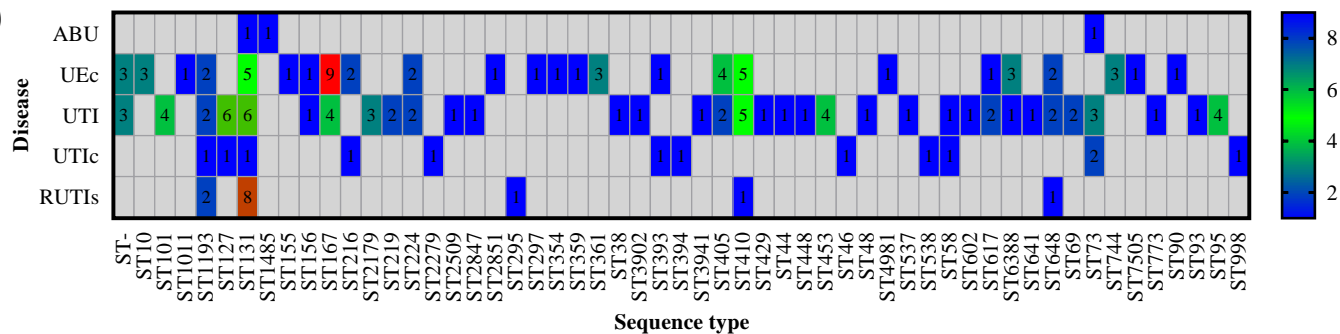

B)

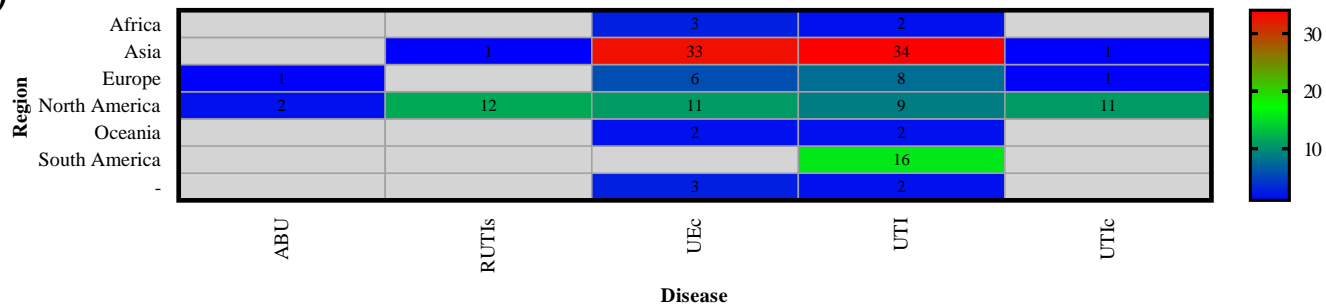

C)

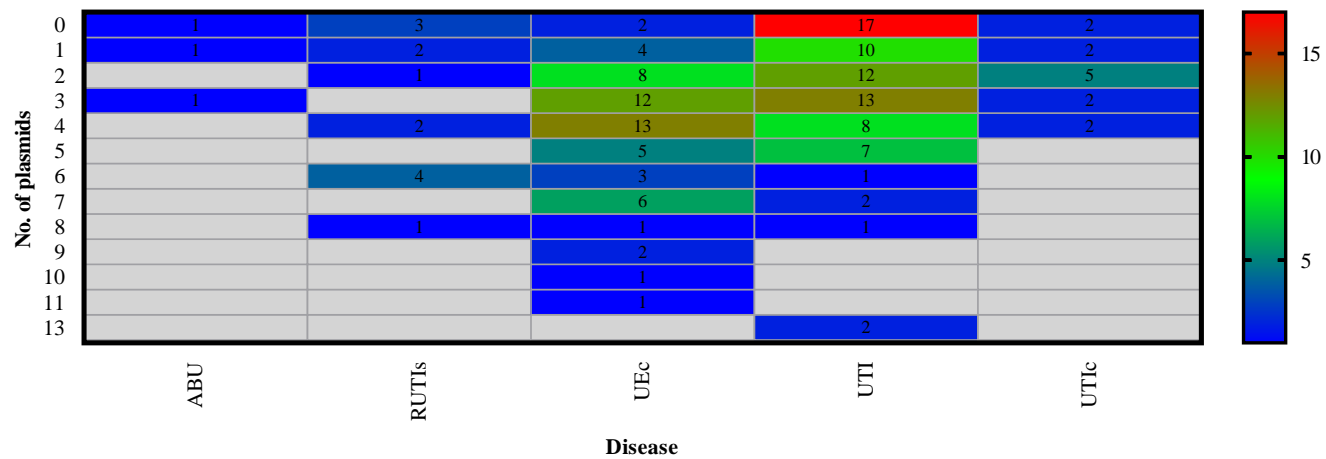

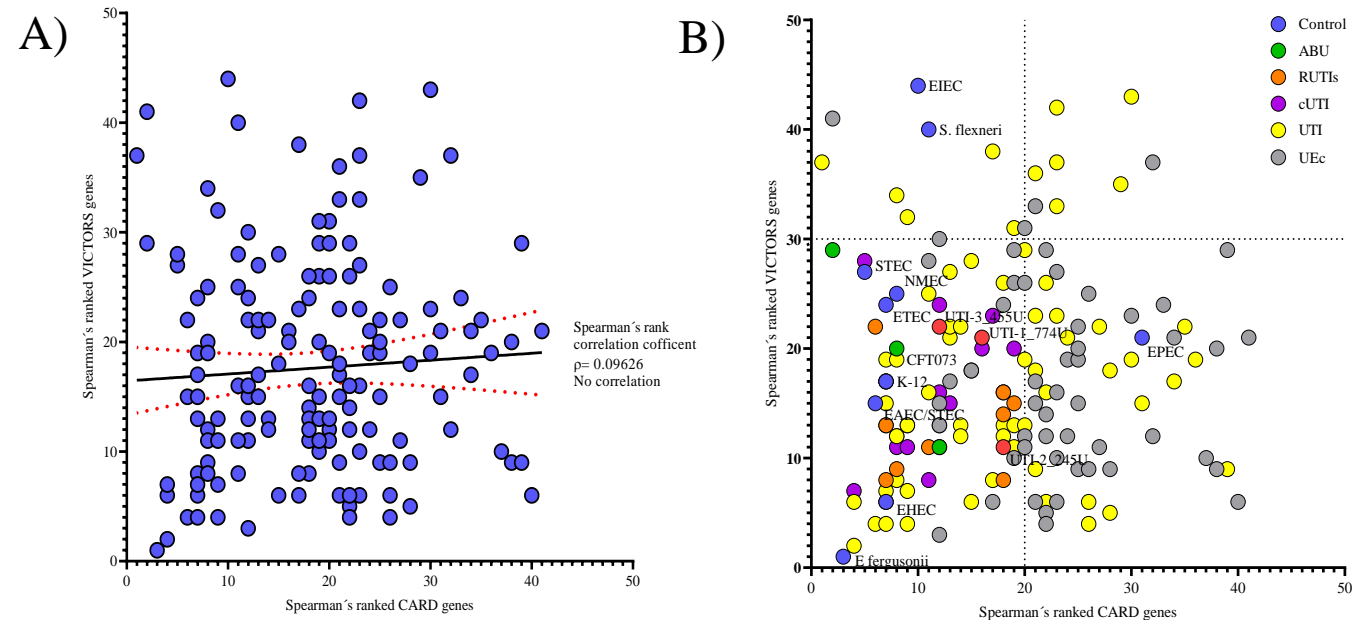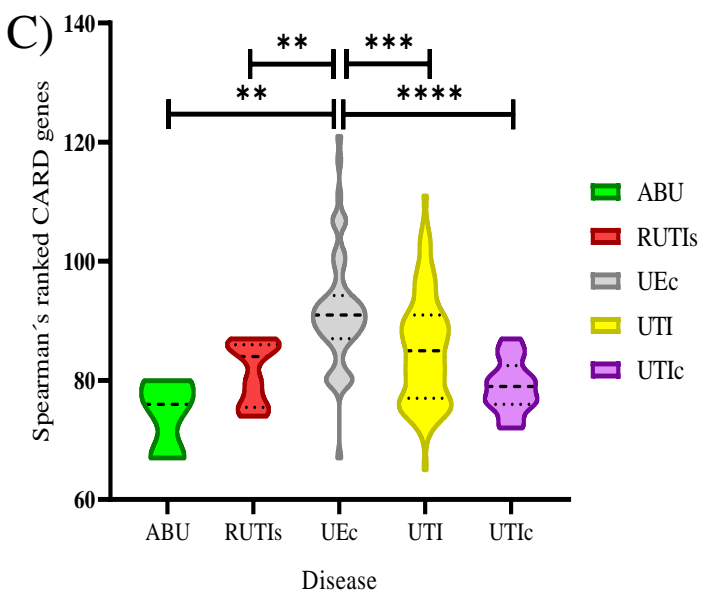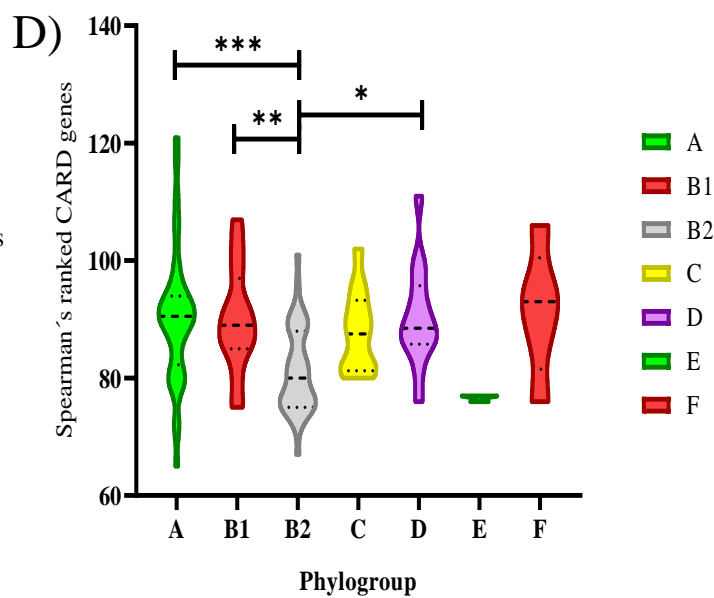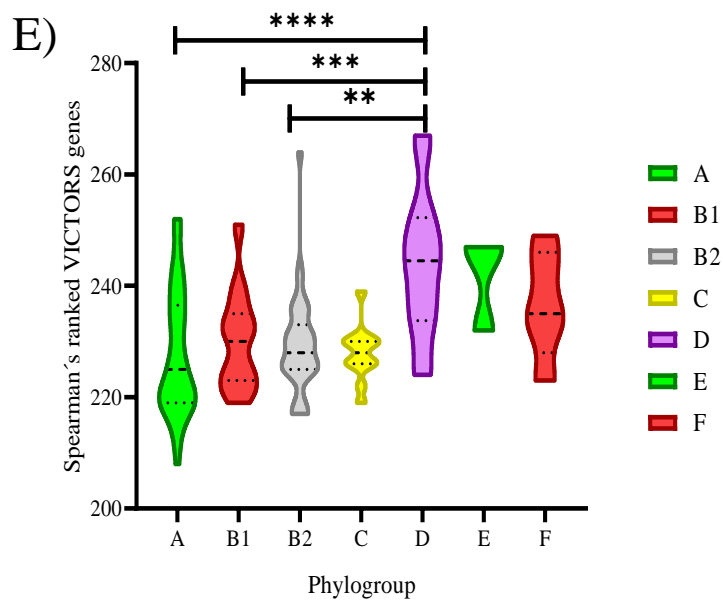

- W3110
- CFT073
- UTI-1
- UTI-2
- UTI-3

*flg*

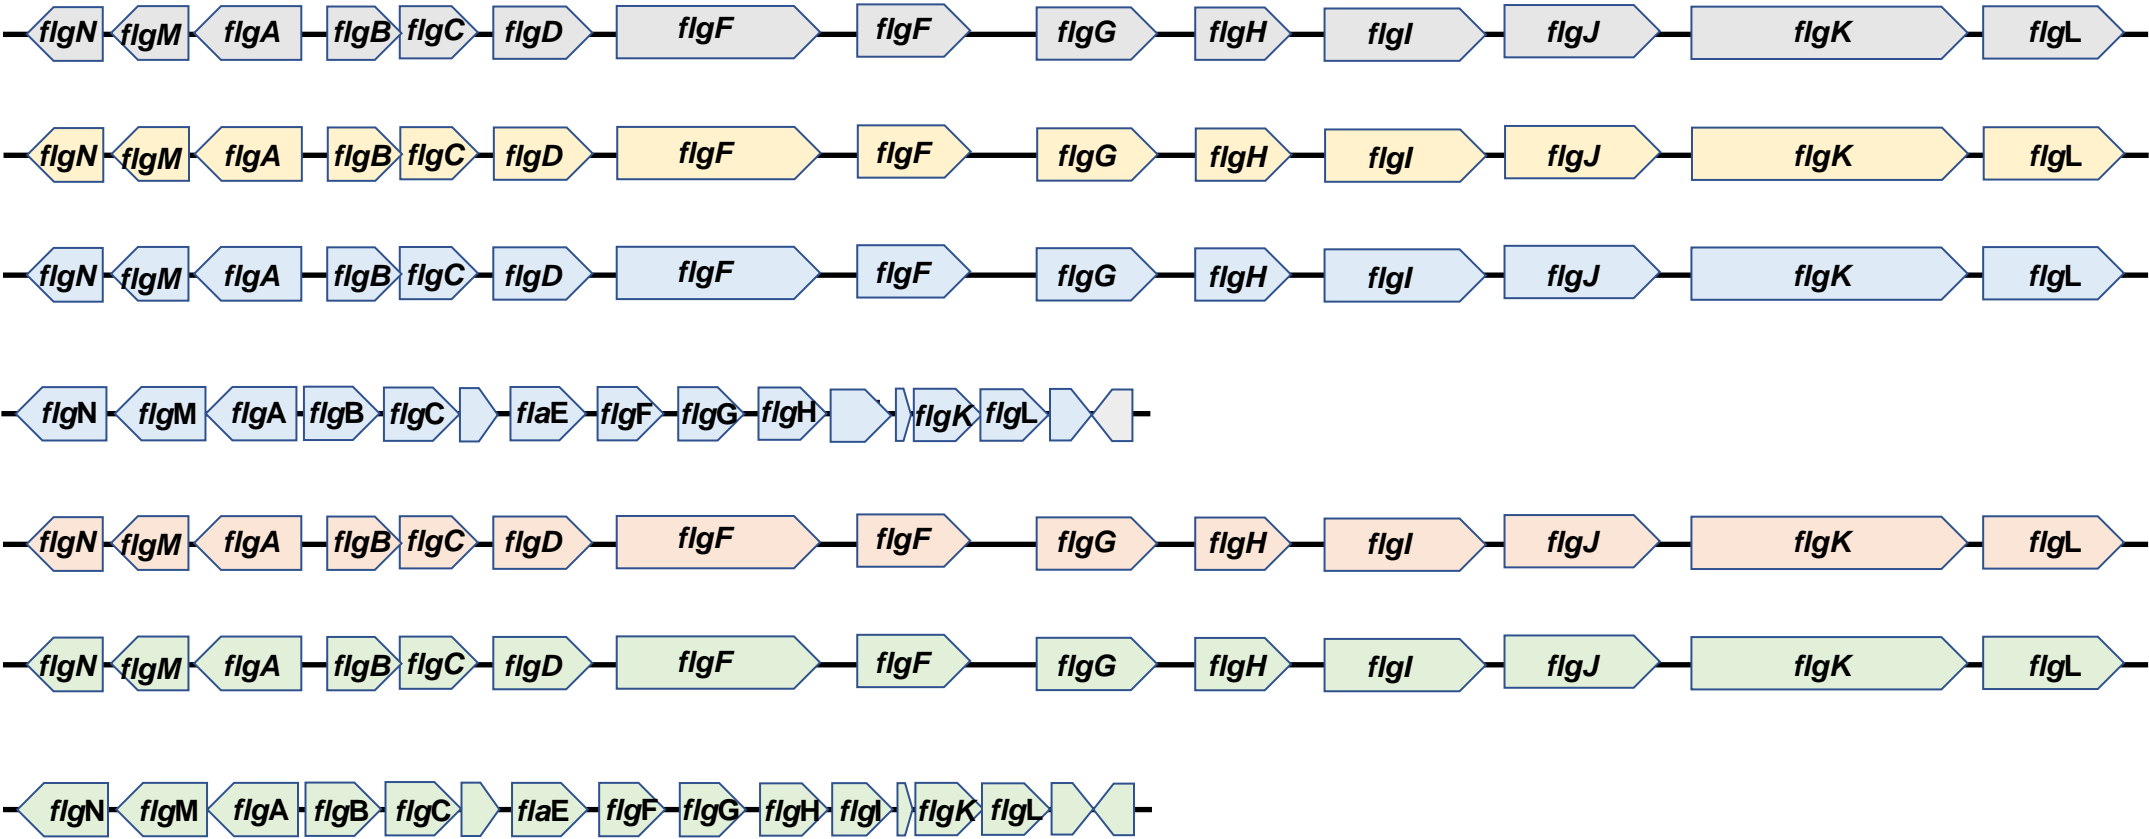



- W3110
- CFT073
- UTI-1
- UTI-2
- UTI-3

*flh*

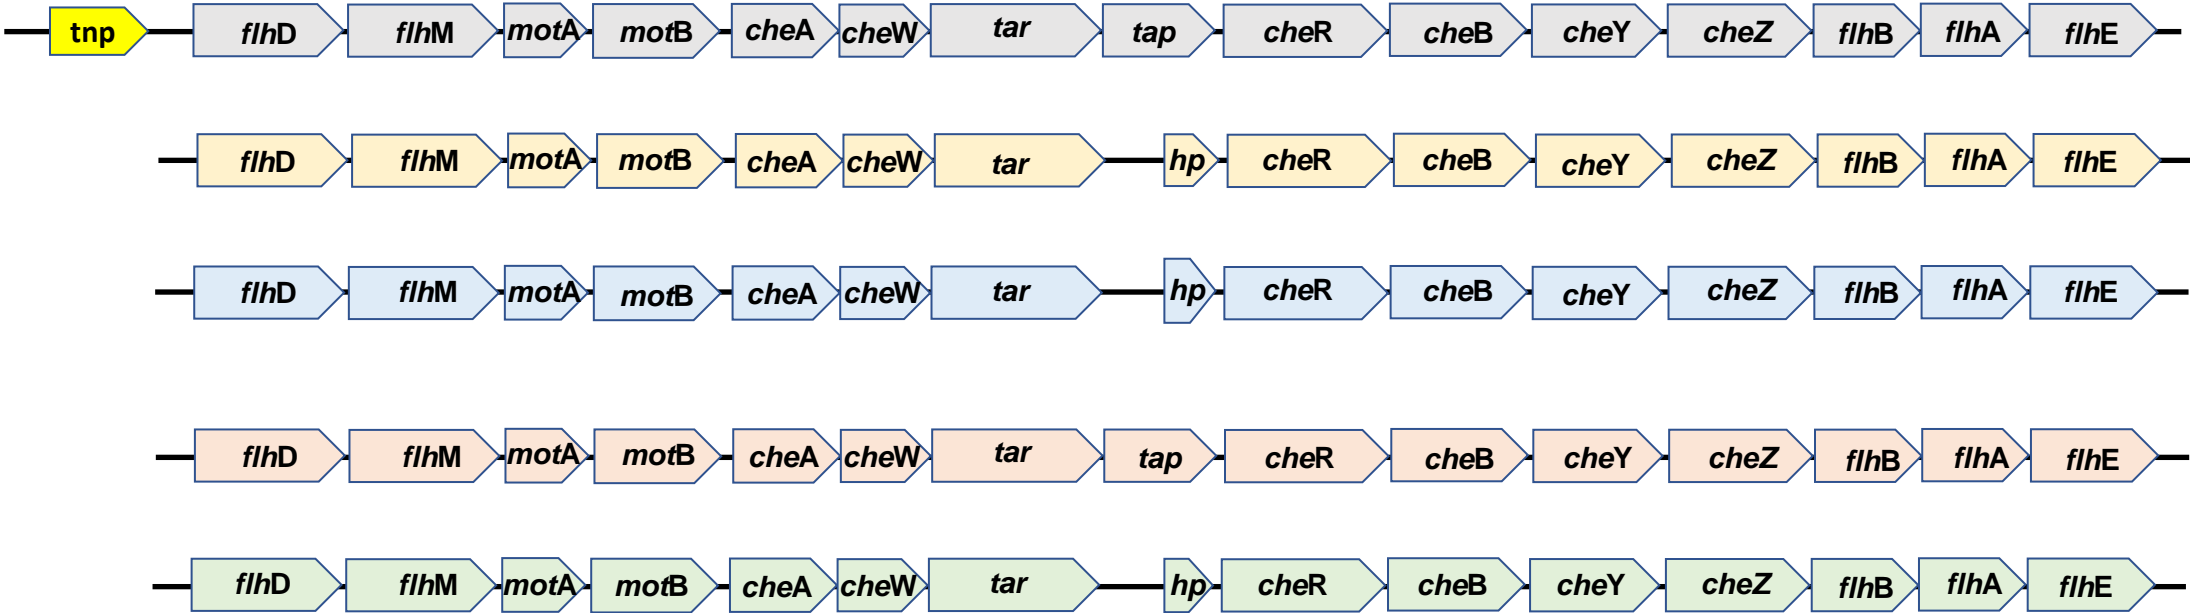

- W3110
- CFT073
- UTI-1
- UTI-2
- UTI-3

*fli*

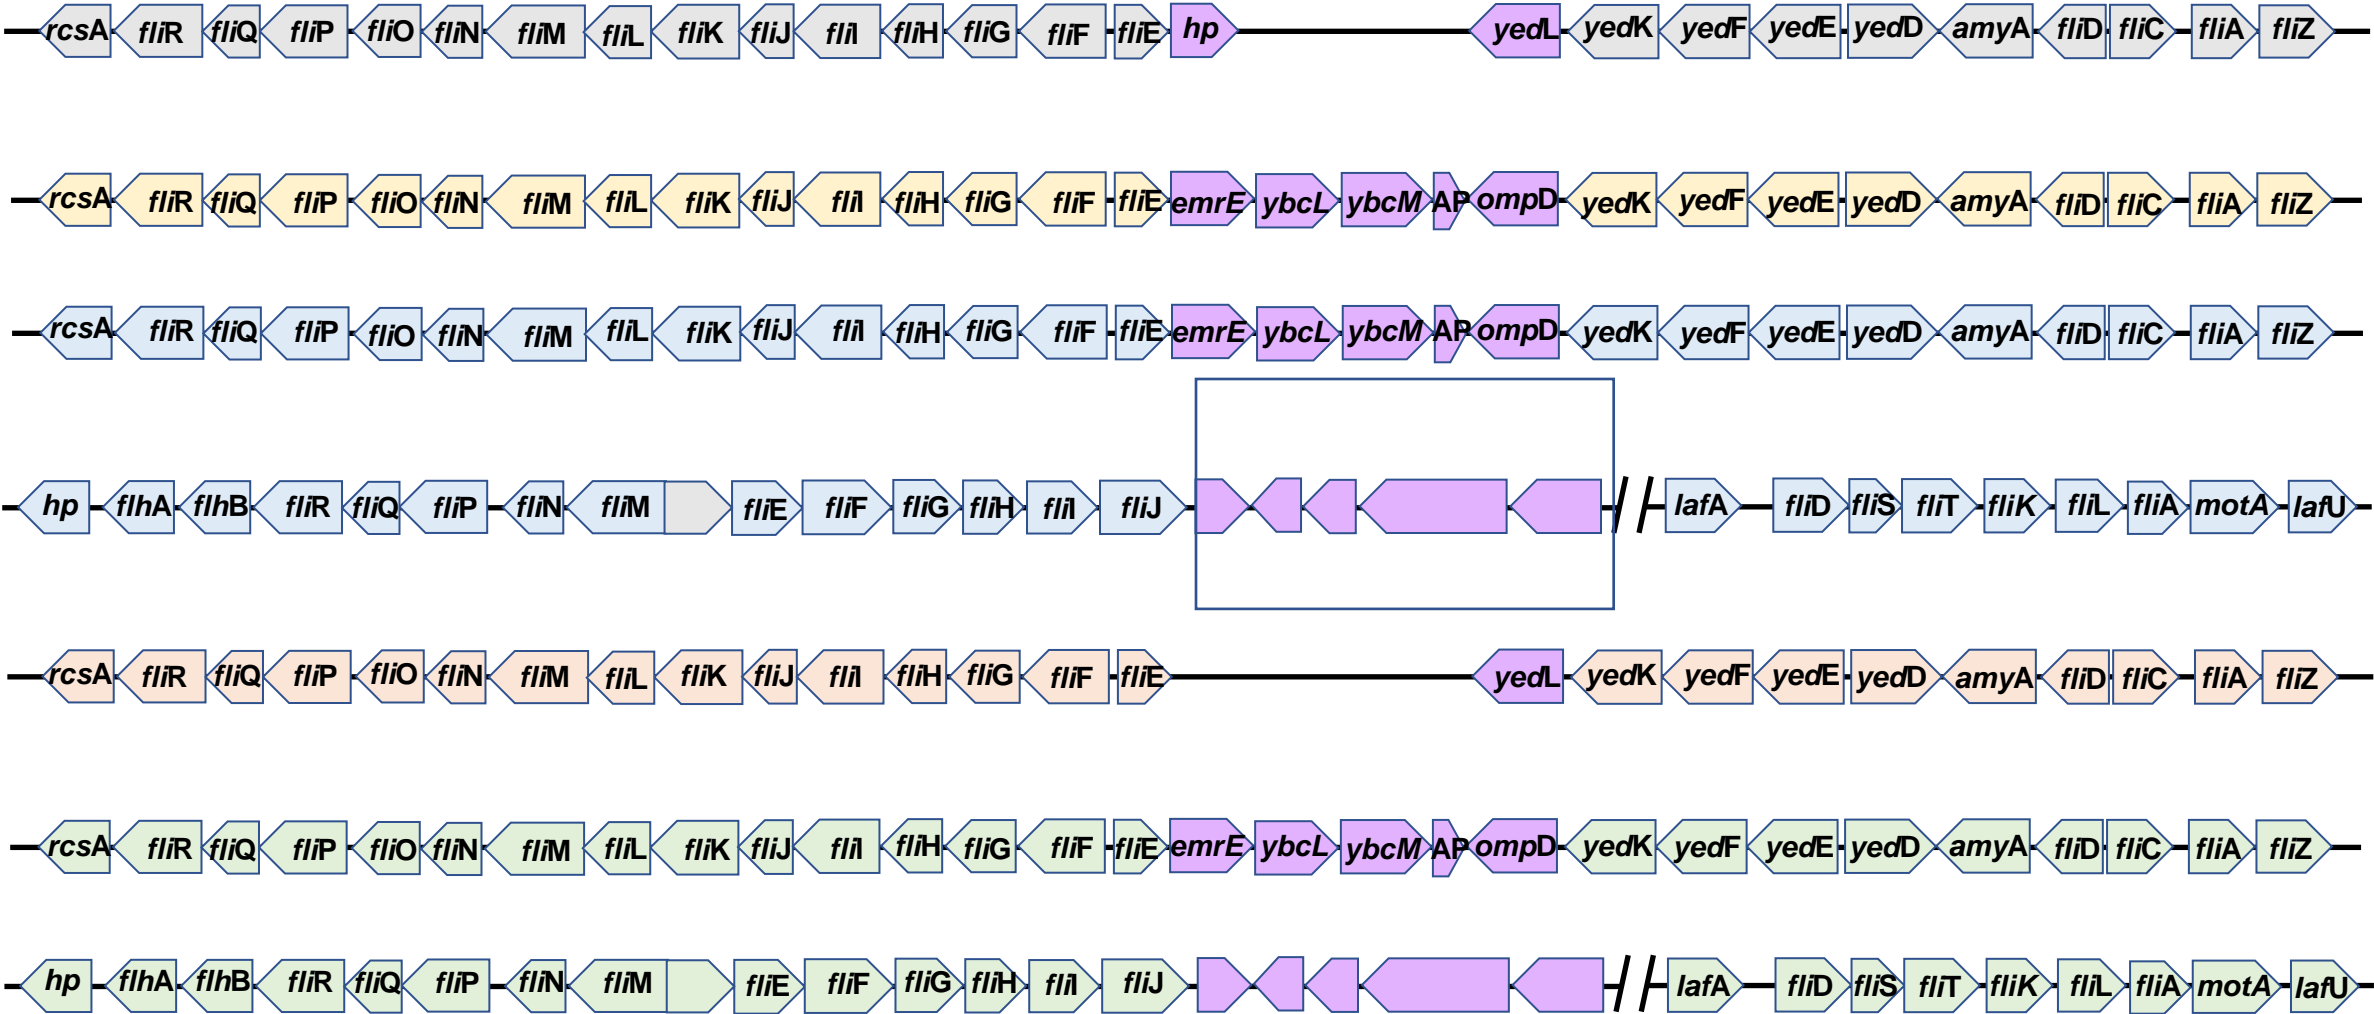

Phages

Serial dilutions

T4

O21

533

$\lambda$

HK022

O43

515

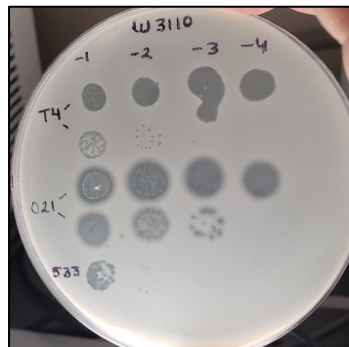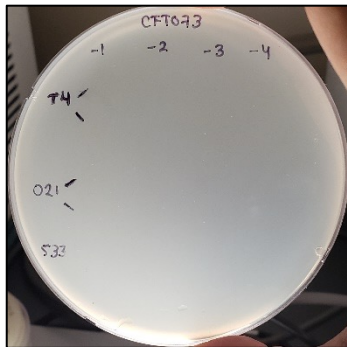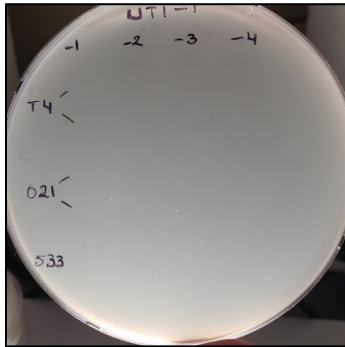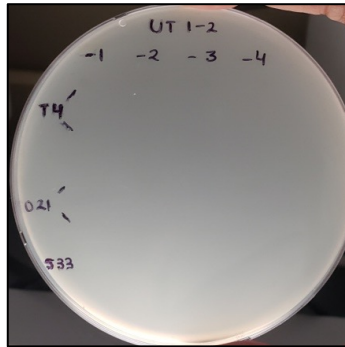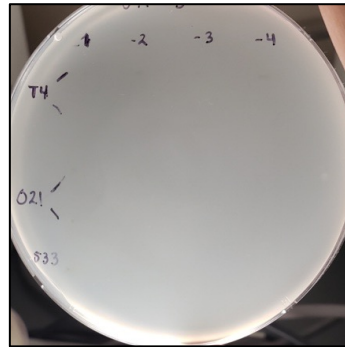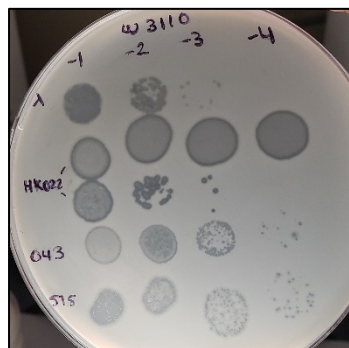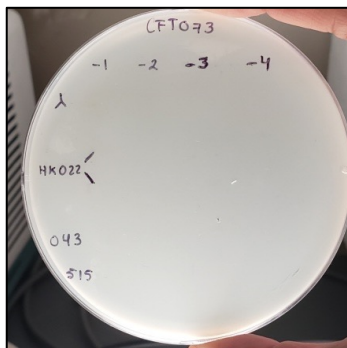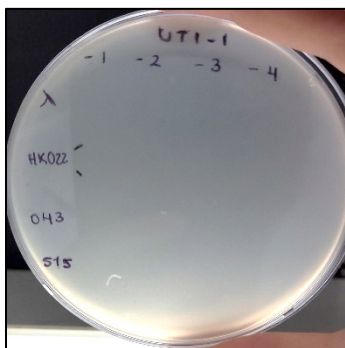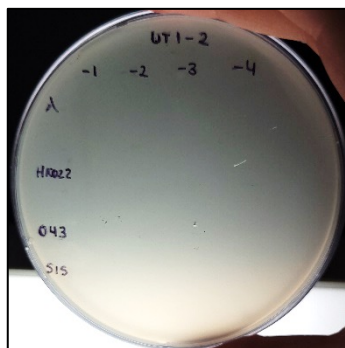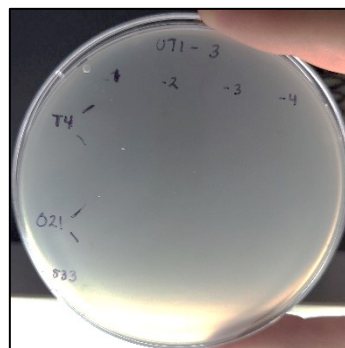

W3110

CFT073

UTI-1\_774U

UTI-2\_245U

UTI-3\_455U

**Bacteriophages sensitivity**
