# Supplementary material for: Comparative genomic analysis of uropathogenic Escherichia coli strains from women with recurrent urinary tract infection
Source: Frontiers journal article supplement (doi:10.3389/fmicb.2023.1340427), 2024-01-24
Supplement: Data_Sheet_1.zip [file Data_Sheet_1.zip]

## Sheet: Genome Database
NUMBER	CLADE	Strain	GenBank Accessions	Disease	Phylogroup	MLST (STs) (Achtman)	CARD	VICTORS	CARD (SPEARMAN)	VICTORS (SPEARMAN)	Number of plasmids	Geographic Group	Collection Year	Comments	Date Modified
1	A	EcPNK006	CP071436,CP071437,CP071438	UTIc	A	46	79	221	11	8	2	North America	2017	Uropathogenic Escherichia coli (UPEC) is the most common cause of urinary tract infection (UTI). This disease disproportionately affects women and frequently develops into recurrent UTI (rUTI) in postmenopausal women. Here we report the complete genome sequences of ten UPEC isolates obtained from the urine of postmenopausal women suffering from rUTI.	2021-03-28T01:46:09.613Z
2	A	2022CK-00450	CP104681,CP104682,CP104683,CP104684,CP104685,CP104686,CP104687,CP104688	UEc	A	216	80	213	12	3	7	North America	2022		2022-10-16T13:04:00.542Z
3	A	EcPF16	CP054224,CP054225,CP054226	UTIc	A	216	72	220	4	7	2	North America	2018	Uropathogenic Escherichia coli (UPEC) is the most common cause of urinary tract infection (UTI). This disease disproportionately affects women and frequently develops into recurrent UTI (rUTI) in postmenopausal women. Here we report the complete genome sequences of seven UPEC isolates obtained from the urine of postmenopausal women suffering from rUTI.	2020-07-02T04:15:35.166Z
4	A	SUISSEKPC3NDM5	CP083701,CP083702,CP083703,CP083704,CP083705,CP083706,CP083707,CP083708	UEc	A	361	121	234	41	21	7	Europe	2020	blaNDM-5- and blaKPC-3-co-harbourng E. coli isolate N1606	2021-09-29T20:45:23.224Z
5	A	XYEH3314	CP110988,CP110989,CP110990,CP110991,CP110992,CP110993,CP110994,CP110995	UEc	A	361	100	225	32	12	7	Asia	2021		2022-12-26T16:10:10.969Z
6	A	EC20	CP084900,CP084903,CP084905,CP084906,CP084907,CP084901,CP084904,CP084902	UEc	A	361	107	233	38	20	7	Asia	2019	Whole genome sequence of NDM-5 and KPC-2 co-producing Klebsiella pneumoniae with capsular serotype K64 that belongs to ST11 from China	2021-10-31T16:37:49.928Z
7	A	Combat13F7	CP019245,CP019246,CP019247,CP019248,CP019249	UTI	A	3902	90	229	22	16	4	Asia	2004	oqxAB positive Escherichia coli Genome sequencing and assembly	2019-09-29T18:44:26.552Z
8	A	TCBK21G178	CP048935,CP048936	UEc	A	-	88	225	20	12	1	Europe	2008		2021-04-25T13:18:31.068Z
9	A	ETEC H10407	FN649414,FN649415,FN649416,FN649417,FN649418	ETEC	A	48	75	237	7	24	4			Escherichia coli ETEC H10407. This strain will be used for comparative genome analysis.	2016-01-17T15:28:29.441Z
10	A	PK5074	CP072802,CP072805,CP072804,CP072806,CP072803,CP072807	UTI	A	48	111	222	39	9	5	Asia	2019	Co-existence of tet(X4) and mcr-1 in an Escherichia coli clinical isolate recovered from a patient in Pakistan	2021-06-02T16:07:10.536Z
11	A	W3110	CP017979	K-12	A	10	75	230	7	17	0	North America	2014	ZK126 is a sub-strain of Escherichia coli K-12 W3110 used for studying long-term stationary phase.	2017-01-16T02:13:47.093Z
12	A	MG1655	U00096	K-12	A	10	75	230	7	17	0		1922	Escherichia coli strain K-12 substrain MG1655. Non-pathogenic strain MG1655 approximates wild-type E. coli as it has been maintained with very little genetic manipulation except for the curing (removal) of bacteriophage lambda and the F plasmid. MG1655 was derived from strain W1485, which was derived by Joshua Lederberg from the original K-12 isolate obtained from a patient in 1922.	2015-03-16T03:17:09.594Z
13	A	VR50	CP011134,CP011135,CP011136,CP011137,CP011138,CP011139,CP011140,CP011141,CP011142,CP011143	UEc	A	10	80	244	12	30	9			Escherichia coli VR50 is an asymptomatic bacteruria isolate.	2016-01-17T15:52:45.340Z
14	A	EC4	CP060974,CP060975,CP060977,CP060978,CP060976	UEc	A	10	91	240	23	27	4	Asia	2016		2022-03-23T23:58:38.260Z
15	A	EC26	CP060880,CP060881,CP060882,CP060884,CP060883	UEc	A	10	80	226	12	13	4	Asia	2017		2022-03-23T23:54:30.153Z
16	A	31HGR-CBG	CP080645,CP080646	UTI	A	44	88	243	20	29	1	North America	2018	Antimicrobial resistance is a global concern around the world. Escherichia coli due to its genomic flexibility acquire antimicrobial resistance genes by horizontal gene transfer. This project aims to evaluate the mobile genetic elements involved in the spread of antimicrobial resistance from clinical, food, and environmental sources in Northeast Mexico.	2021-08-26T16:37:44.034Z
17	A	EC7	CP060963,CP060964,CP060965,CP060968,CP060966,CP060967	UEc	A	744	98	236	30	23	5	Asia	2016		2022-03-23T23:55:09.285Z
18	A	EC590	CP016182	UEc	A	744	91	219	23	6	0	Asia	2013	Complete genome of colistin-resistant strains from Malaysia	2016-08-26T18:53:32.150Z
19	A	EC13	CP060928,CP060929,CP060930,CP060932,CP060931	UEc	A	744	94	238	26	25	4	Asia	2016		2022-03-23T23:54:48.663Z
20	A	Y5	CP013483	UTI	A	167	94	217	26	4	0	Asia	2013	To reveal characteristics of chromosome-borned blaNDM-1 gene positive Enterobacteriaceae strain	2016-11-19T07:30:25.100Z
21	A	NDM3	CP083880,CP083881,CP083882,CP083883	UEc	A	167	93	222	25	9	3	North America	2020		2022-02-26T21:00:07.829Z
22	A	NDM5	CP083872,CP083873,CP083874,CP083875,CP083876	UEc	A	167	117	219	40	6	3	North America	2020		2022-02-26T20:56:57.076Z
23	A	NDM6	CP083869,CP083867,CP083868,CP083870,CP083871	UEc	A	167	90	218	22	5	4	North America	2020		2022-02-26T21:00:06.271Z
24	A	5CRE51	CP021175,CP021176,CP021177	UTI	A	617	65	252	1	37	2	Asia	2016	Investigation of colistin resistance gene mcr-1 in clinical isolate	2017-05-29T21:49:58.580Z
25	A	Ec42	CP059119,CP059120,CP059121,CP059122,CP059123,CP059124	UEc	A	617	93	235	25	22	5	Africa	2016	Our aim of the project is to investigate the current status of antimicrobial resistance among clinical isolates from Ghana, and further to explore major resistance mechanisms involved.	2021-08-26T12:28:01.437Z
26	A	BR32-DEC	CP035350,CP035349,CP035351	UTI	A	617	85	221	17	8	2	South America	2015	11 uropathogenic Escherichia coli genomes isolated in "Hospital da Clinicas de Botucatu", Sao Paulo - Brazil	2019-07-14T13:01:22.444Z
27	A	CH611 eco	CP017980	UEc	A	4981	79	241	11	28	0	Asia	2015	Multidrug resistance in gram-negative bacteria, especially for carbapenem-resistant Enterobacteriaceae, presents a particularly critical problem in China. Tigecycline and colistin are considered as the only available active antimicrobials for carbapenemase-producing Enterobacteriaceae. However, the plasmid-mediated colistin resistance gene, mcr-1, was identified in Enterobacteriaceae, with a prev…	2017-05-29T14:05:05.161Z
28	A	CREC-629	CP024815,CP024816,CP024817,CP024818	UEc	A	167	93	228	25	15	3	Asia	2015		2022-12-26T03:12:17.935Z
29	A	CREC-532	CP024830,CP024831,CP024832,CP024833	UEc	A	167	94	222	26	9	3	Asia	2015		2022-12-26T03:12:30.653Z
30	A	EC11	CP060938,CP060939,CP060940,CP060942,CP060943,CP060944,CP060945,CP060941	UEc	A	167	89	219	21	6	7	Asia	2016		2022-03-23T23:54:47.131Z
31	A	APEC 01	CP028310	UTI	A	167	72	208	4	2	0	Asia	2016	To find out antibiotic resistant genes, De novo mutations, presence of bacteriophage in genome, phylogenetic tree of uropathogens and correlation b/w different phylogentic groups and antibiotic resistance of clinical isolates. Investigating the potential of Lactic acid bacteria to replace antibiotic for treatment of UTI;missing ribosomal protein genes;missing tRNA genes	2018-05-30T23:14:36.012Z
32	A	52148	CP050382,CP050383,CP050384	UTI	A	167	83	219	15	6	2	Europe	2019	Genomic Characterization of OXA/NDM Producers in The Czech republic	2020-04-12T02:38:53.694Z
33	A	W60	CP058342,CP058343,CP058344	UEc	A	167	87	239	19	26	2	Asia	2018	E. coli W60 sequencing assembly results, including chromosome and two plasmids	2021-01-01T18:36:44.242Z
34	A	EC29	CP060867,CP060869,CP060870,CP060871,CP060872,CP060868	UEc	A	167	91	219	23	6	5	Asia	2017		2022-03-23T23:58:13.940Z
35	A	EC2	CP041955,CP041956,CP041957,CP041958,CP041959,CP041960	UEc	A	167	90	225	22	12	5	North America	2017	Submission of consensus genome assemblies from a critically ill patient with polymicrobial infections due to multi-drug resistant Escherichia coli, Klebsiella pneumoniae, and Pseudomonas aeruginosa who had traveled to India and was also colonized by Candida auris. A precision medicine approach using whole genome sequencing revealed a multiplicity of mobile elements associated with NDM-1, NDM-5, a…	2019-12-31T14:32:34.381Z
36	A	ECO3183	CP104721,CP104722,CP104723	UTI	A	167	96	218	28	5	2	Asia	2019		2022-10-16T13:11:36.747Z
37	B	EC931	CP049118,CP049119,CP049130,CP049131,CP049120,CP049123,CP049124,CP049125,CP049126,CP049127,CP049128,CP049129	UTI	A	773	91	248	23	33	13	Asia	2017	Whole genome sequencing and comparative genomic analysis of tigecycline and colistin resistant Escherichia coli	2020-11-28T10:50:28.970Z
38	B	XH993	CP019361,CP019360	UTI	A	93	91	252	23	37	3	Asia	2016	Escherichia coli	2021-02-28T01:54:23.928Z
39	B	EC6563	CP095856,CP095859,CP095857,CP095858	UTI	A	3941	105	232	36	19	3	Asia	2020		2022-05-27T05:10:28.675Z
40	C	190	CP020520, CP020524, CP020523, CP020522, CP020521	UEc	C	90	91	229	23	16	4	North America	2016		2019-03-24T01:25:18.883Z
41	C	Ec45	CP059125,CP059126,CP059127,CP059128,CP059129	UEc	C	410	88	239	20	26	4	Africa	2016	Our aim of the project is to investigate the current status of antimicrobial resistance among clinical isolates from Ghana, and further to explore major resistance mechanisms involved.	2021-08-26T12:28:03.544Z
42	C	ST410	CP029630,CP029631	UTI	C	410	87	226	19	13	1	Africa	2015	AMR-GhanaOur aim of the project is to investigate the current status of antimicrobial resistance among clinical isolates from Ghana， and further to explore major resistance mechanisms involved.	2018-09-30T13:35:55.728Z
43	C	YD786	CP013112	RUTI	C	410	75	221	7	8	0	North America	2012	to characterize an UTI Escherichia coli isolate producing fosA6	2016-01-17T17:47:51.965Z
44	C	BR12-DEC	CP035325,CP035326,CP035327,CP035328,CP035329	UTI	C	410	80	226	12	13	4	South America	2015	11 uropathogenic Escherichia coli genomes isolated in "Hospital da Clinicas de Botucatu", Sao Paulo - Brazil	2019-07-14T12:59:10.344Z
45	C	20-16	CP123024,CP123025,CP123026,CP123027,CP123028	UEc	C	410	96	222	28	9	4	Asia	2020		2023-05-27T19:08:52.460Z
46	C	Ec1079	CP081306,CP081307,CP081308,CP081309,CP081310	UTI	C	410	94	219	26	6	4	Africa	2015	Our aim of the project is to investigate the current status of antimicrobial resistance among clinical isolates from Ghana, and further to explore major resistance mechanisms involved.	2021-08-26T19:44:54.119Z
47	C	GN4554	CP102694,CP102695,CP102696,CP102697,CP102698,CP102699,CP102700	UTI	C	410	82	226	14	13	6	North America	2021		2023-03-26T22:01:27.997Z
48	C	Survcare253	CP076305,CP076309,CP076308,CP076306,CP076307,CP076310,CP076311	UEc	C	2851	90	227	22	14	6	Europe	2019	Our study goals to molecular investigation on resistance mechanisms of CMY-42 encoding artreonam and avibactam resistant Eschichia coli.	2021-06-26T02:52:24.519Z
49	C	EC27	CP060873,CP060874,CP060875,CP060877,CP060878,CP060879,CP060876	UEc	C	410	83	231	15	18	6	Asia	2017		2022-03-23T23:54:21.545Z
50	C	EC25	CP035123,CP035124,CP035126,CP035127,CP035128,CP035125	UTI	C	410	102	230	34	17	5	Asia	2017	Whole genome sequencing and comparative genomic analysis of carbapenem-resistant Escherichia coli	2019-07-14T12:26:04.590Z
51	C	EC19	CP060908,CP060909,CP060910,CP060912,CP060913,CP060911	UEc	C	410	81	230	13	17	5	Asia	2017		2022-03-23T23:58:49.574Z
52	C	EC24	CP060885,CP060886,CP060887,CP060889,CP060890,CP060891,CP060888	UEc	C	410	81	230	13	17	6	Asia	2017		2022-03-23T23:54:38.153Z
53	D	BR10-DEC	CP035360,CP035361,CP035362,CP035363,CP035364,CP035365	UTI	A	2509	90	219	22	6	5	South America	2015	11 uropathogenic Escherichia coli genomes isolated in "Hospital da Clinicas de Botucatu", Sao Paulo - Brazil	2019-07-14T13:02:16.502Z
54	D	O157:H7 str. EC10	CP060946,CP060947,CP060948,CP060949	UEc	B1	224	87	223	19	10	3	Asia	2016		2022-03-24T03:48:59.017Z
55	D	EC9	CP060950,CP060951,CP060952	UEc	B1	224	91	223	23	10	2	Asia	2016		2022-03-23T23:54:45.585Z
56	D	BR64-DEC	CP035354,CP035352,CP035353,CP035355,CP035356,CP035357,CP035358,CP035359	UTI	B1	224	87	224	19	11	7	South America	2015	11 uropathogenic Escherichia coli genomes isolated in "Hospital da Clinicas de Botucatu", Sao Paulo - Brazil	2019-07-14T13:05:32.670Z
57	D	BR29-DEC	CP035339,CP035335,CP035345,CP035346,CP035347,CP035348,CP035336,CP035337,CP035338,CP035340,CP035341,CP035342	UTI	B1	224	85	221	17	8	13	South America	2015	11 uropathogenic Escherichia coli genomes isolated in "Hospital da Clinicas de Botucatu", Sao Paulo - Brazil	2019-07-14T12:59:36.634Z
58	E	CFSAN029787	CP011416,CP011417,CP011418	EIEC	B1	99	78	276	10	44	2	Europe	2012	Draft and complete genome sequences of foodborne bacterial pathogens collected for research purposes at the FDA's Center for Food Safety and Applied Nutrition.	2016-01-17T16:02:30.567Z
59	E	EC5502	CP092647,CP092645,CP092646	UEc	B1	156	107	222	38	9	2	Asia	2021		2022-03-24T01:49:57.534Z
60	E	UFU_EC98	CP024092,CP024093,CP024094,CP024095	UTI	B1	156	89	222	21	9	3	South America	2014	Escherichia coli EC98 was isolated from human urine in 2014. The antibiotic resistance is a main characteristic of this strain.	2017-11-24T17:03:33.615Z
61	E	13KWH46	CP019250,CP019251,CP019252,CP019253,CP019254,CP019255	UTI	B1	602	97	250	29	35	5	Asia	2013	oqxAB positive Escherichia coli Genome sequencing and assembly	2019-09-29T18:44:54.416Z
62	E	MSHS 472	CP041302,CP041301	UTI	B1	-	83	241	15	28	1	North America	2006	This strain was sequenced as part of a study that investigated the activity of the outer membrane protease OmpT among uropathogenic Escherichia coli clinical isolates.	2019-09-30T16:44:41.305Z
63	E	CHL5009T	CP032936,CP032937,CP032943,CP032942,CP032941,CP032940,CP032939,CP032938	UTI	B1	101	89	236	21	23	7	Oceania	2017	The characterisation of the first human case of E . coli harbouring mcr gene in New Zealand. This isolate is the first documented case of the mcr gene found in New Zealand. Two types of mcr genes (mcr-1 and mcr-3) were found on different plasmids with the mcr-3 gene inserted in a region near blaCTX-M-55 gene.	2018-11-29T02:37:20.638Z
64	E	779	CP086220,CP086221,CP086222,CP086223,CP086224,CP086225,CP086226,CP086227,CP086228	UTI	B1	101	102	230	34	17	8	Asia	2016		2022-04-26T19:08:41.744Z
65	E	MS6192	CP054940,CP054941,CP054942,CP054943,CP054944	UTI	B1	101	86	226	18	13	4	Asia	2003	Extraintestinal pathogenic Escherichia coli (ExPEC) are the leading cause of urinary and systemic infections, where antibiotic resistance complicates successful treatment. Carbapenems are considered a last-resort antibiotic, however the spread of plasmid-encoded carbapenemases such as the New-Delhi Metallo-beta-Lactamase (blaNDM-1) challenges their effectiveness. E. coli ST101 is an emerging, aty…	2020-07-01T18:19:37.231Z
66	E	MS6193	CP047405,CP047406,CP047407,CP047408	UTI	B1	101	86	225	18	12	3	Asia	2003	Extraintestinal pathogenic Escherichia coli (ExPEC) are the leading cause of urinary and systemic infections, where antibiotic resistance complicates successful treatment. Carbapenems are considered a last-resort antibiotic, however the spread of plasmid-encoded carbapenemases such as the New-Delhi Metallo-beta-Lactamase (blaNDM-1) challenges their effectiveness. E. coli ST101 is an emerging, aty…	2020-07-01T11:15:23.457Z
67	E	EC21	CP060899,CP060900,CP060901	UEc	B1	359	93	232	25	19	2	Asia	2017		2022-03-23T23:54:39.690Z
68	E	XH987	CP102675,CP102673,CP102672,CP102674	EPEC	B1	6388	99	234	31	21	5	Asia	2015		2022-09-02T19:08:01.200Z
69	E	XH989	CP102679,CP102676,CP102678,CP102677	UTI	B1	6388	104	235	35	22	3	Asia	2015		2022-09-02T19:08:13.640Z
70	E	EC15	CP060919,CP060920,CP060921,CP060923,CP060922	UEc	B1	6388	92	232	24	19	4	Asia	2016		2022-03-23T23:54:50.304Z
71	E	EC18	CP060914,CP060915,CP060916,CP060918,CP060917	UEc	B1	6388	92	232	24	19	4	Asia	2016		2022-03-23T23:58:25.339Z
72	E	EC12	CP060933,CP060934,CP060935,CP060937,CP060936	UEc	B1	6388	92	232	24	19	4	Asia	2016		2022-03-23T23:54:51.952Z
73	E	NB4833	CP118601,CP118602,CP118603,CP118604	UEc	B1	297	102	234	34	21	3	Asia	1984		2023-03-26T19:27:26.608Z
74	E	00-3076	CP027584,CP027585	STEC	B1	223	73	240	5	27	1		2000	PulseNet STEC genome reference library	2018-05-26T08:02:24.277Z
75	E	EC71	CP085622,CP085624,CP085625,CP085626,CP085623	UEc	B1	155	107	233	38	20	4		2020	EC71 is an E. coli isolated from a tertiary hospital in Guangzhou, which contains an IncHI2 plasmid carrying CTX-M-55 gene.	2021-11-30T21:56:19.218Z
76	E	EcPF20	CP071441,CP071442,CP071443	UTIc	B1	58	80	237	12	24	2	North America	2018	Uropathogenic Escherichia coli (UPEC) is the most common cause of urinary tract infection (UTI). This disease disproportionately affects women and frequently develops into recurrent UTI (rUTI) in postmenopausal women. Here we report the complete genome sequences of ten UPEC isolates obtained from the urine of postmenopausal women suffering from rUTI.	2021-03-28T01:51:30.296Z
77	E	EC6622	CP096587,CP096588,CP096589	UTI	B1	58	98	232	30	19	2	Asia	2021		2022-05-27T07:47:24.570Z
78	E	UPEC-245U/190328	CP049845,CP049851,CP049850,CP049849,CP049848,CP049847,CP049846	RUTI	B1	295	86	224	18	11	6	North America	2019	host_description:30-year-old female patient with recurrent urinary tract infection;host_disease_outcome:chronic disease;host_disease_stage:chronic disease;host_health_state:chronic disease;host_subject_id:Not applicable	2022-05-27T10:12:14.508Z
79	E	BR07-DEC	CP035322,CP035323,CP035324	UTI	B1	2179	86	239	18	26	2	South America	2015	11 uropathogenic Escherichia coli genomes isolated in "Hospital da Clinicas de Botucatu", Sao Paulo - Brazil	2019-07-14T12:57:40.092Z
80	E	BR03-DEC	CP035321	UTI	B1	2179	90	239	22	26	0	South America	2015	11 uropathogenic Escherichia coli genomes isolated in "Hospital da Clinicas de Botucatu", Sao Paulo - Brazil	2019-07-14T12:57:15.958Z
81	E	BR02-DEC		UTI	B1	2179	89	251	21	36	0	South America	2015		2019-03-24T02:02:06.266Z
82	E	CRE1	CP034399,CP034396,CP034397,CP034400,CP034398	UTI	B1	448	99	228	31	15	4	Asia	2014	Typing and conjugative transfer of antibiotic resistance plasmids in carbapenem resistant E. coli	2019-07-14T13:15:30.102Z
83	E	ARL09/232	CP049967,CP049968,CP049969,CP049970,CP049971,CP049972,CP049973,CP049974,CP049975	UEc	B1	7505	85	219	17	6	8	Oceania	2009	Complete genome assembly of multidrug-resistant New Delhi metallo-beta-lactamase-1 (NDM-1)- producing Escherichia coli human isolate from New Zealand	2020-07-02T05:23:31.199Z
84	E	BR25-DEC	CP035331,CP035332,CP035333,CP035334	UTI	B1	641	80	224	12	11	3	South America	2015	11 uropathogenic Escherichia coli genomes isolated in "Hospital da Clinicas de Botucatu", Sao Paulo - Brazil	2019-07-14T12:59:25.559Z
85	E	13TMH22	CP019256,CP019257,CP019258	UTI	B1	453	88	226	20	13	2	Asia	2013	oqxAB positive Escherichia coli Genome sequencing and assembly	2019-09-29T18:44:31.085Z
86	E	EDL933	CP028305	UTI	B1	453	75	219	7	6	0	Asia	2016	To find out antibiotic resistant genes, De novo mutations, presence of bacteriophage in genome, phylogenetic tree of uropathogens and correlation b/w different phylogentic groups and antibiotic resistance of clinical isolates. Investigating the potential of Lactic acid bacteria to replace antibiotic for treatment of UTI;missing ribosomal protein genes;missing tRNA genes	2018-05-30T23:17:23.107Z
87	E	MG655	CP028306	UTI	B1	453	75	220	7	7	0	Asia	2016	To find out antibiotic resistant genes, De novo mutations, presence of bacteriophage in genome, phylogenetic tree of uropathogens and correlation b/w different phylogentic groups and antibiotic resistance of clinical isolates. Investigating the potential of Lactic acid bacteria to replace antibiotic for treatment of UTI;missing ribosomal protein genes;missing tRNA genes	2018-05-30T23:17:18.045Z
88	E	E24377A	CP028308	UTI	B1	453	76	221	8	8	0	Asia	2016	To find out antibiotic resistant genes, De novo mutations, presence of bacteriophage in genome, phylogenetic tree of uropathogens and correlation b/w different phylogentic groups and antibiotic resistance of clinical isolates. Investigating the potential of Lactic acid bacteria to replace antibiotic for treatment of UTI;missing ribosomal protein genes;missing tRNA genes	2018-05-30T23:17:12.955Z
89	E	Sakai	CP028307	EHEC	B1	453	75	219	7	6	0	Asia	2016	To find out antibiotic resistant genes, De novo mutations, presence of bacteriophage in genome, phylogenetic tree of uropathogens and correlation b/w different phylogentic groups and antibiotic resistance of clinical isolates. Investigating the potential of Lactic acid bacteria to replace antibiotic for treatment of UTI;missing ribosomal protein genes;missing tRNA genes	2018-05-30T23:17:28.865Z
90	F	Shigella flexneri 2a ATCC 29903	CP026788,CP026789,CP026790	S. flexneri	A	245	79	259	11	40	2			PulseNet STEC genome reference library;many frameshifted proteins	2018-05-26T01:46:00.031Z
91	F	XH990	CP019359,CP019356,CP019357,CP019358	UEc	D	1011	95	224	27	11	3	Asia	2016	Escherichia coli	2021-01-02T05:43:50.902Z
92	F	Combat11I9	CP021726,CP021727,CP021728,CP021729,CP021730	UTI	E	2847	76	232	8	19	4	Asia	2004	oqxAB positive Escherichia coli Genome sequencing and assembly	2019-09-29T18:47:46.085Z
93	F	EC1515	CP021844,CP021845,CP021846,CP021847	UTI	E	219	77	247	9	32	3	Asia	2007	EC974 and EC1515 were isolated from a patient with recurrent urinary tract infection	2017-07-22T19:25:47.950Z
94	F	EC974	CP021840,CP021841,CP021842,CP021843	UTI	E	219	77	247	9	32	3	Asia	2007	EC974 and EC1515 were isolated from a patient with recurrent urinary tract infection	2017-07-22T19:25:44.616Z
95	F	E. fergusonii ATCC 35469	CU928158,CU928144	E fergusonii	-	5298	69	164	3	1	1			Escherichia fergusonii ATCC 35469. Escherichia fergusonii ATCC 35469 was isolated from human feces and will be used for comparative analysis with other Escherichia species.	2015-03-16T03:17:09.594Z
96	F	2022CK-00450	CP104681,CP104682,CP104683,CP104684,CP104685,CP104686,CP104687,CP104688	UEc	A	216	80	213	12	3	7	North America	2022		2022-10-16T13:04:00.542Z
97	G	042	FN554766,FN554767	EAEC/STEC	D	414	74	228	6	15	5			Escherichia coli 042. This genome will be used for comparative analysis.	2015-03-16T03:17:09.594Z
98	G	EcPNK004	CP071439,CP071440	UTIc	D	393	87	233	19	20	1	North America	2017	Uropathogenic Escherichia coli (UPEC) is the most common cause of urinary tract infection (UTI). This disease disproportionately affects women and frequently develops into recurrent UTI (rUTI) in postmenopausal women. Here we report the complete genome sequences of ten UPEC isolates obtained from the urine of postmenopausal women suffering from rUTI.	2021-03-28T01:46:16.912Z
99	G	THO-008	AP022536,AP022537,AP022538,AP022539	UEc	D	393	111	243	39	29	3	Asia	2018	This project is related to metagenomic survey and genomic epidemiology analysis of antimicrobial resistance bacteria (in particular, carbapenem and/or beta-lactam resistant Enterobacteriaceae) in Japanese hospital sewage.	2020-11-30T12:59:45.073Z
100	G	EcPF15	CP054227,CP054228,CP054229	UTIc	D	394	76	225	8	12	2	North America	2018	Uropathogenic Escherichia coli (UPEC) is the most common cause of urinary tract infection (UTI). This disease disproportionately affects women and frequently develops into recurrent UTI (rUTI) in postmenopausal women. Here we report the complete genome sequences of seven UPEC isolates obtained from the urine of postmenopausal women suffering from rUTI.	2020-07-02T04:13:15.100Z
101	G	ECONC427	CP071133,CP071135,CP071134,CP071136	UTI	D	-	98	267	30	43	3	North America	2019	Detection of mcr-1 gene in a clinical Escherichia coli strain in North Carolina: first report	2021-04-25T14:54:26.311Z
102	G	EC1	CP058574,CP058575,CP058576,CP058577	UTI	D	69	92	234	24	21	3	Oceania	2019	Identification and Characterisation of Fosfomycin Resistance in Escherichia coliUrinary Tract Infection Isolates from Australia	2020-07-28T08:02:24.056Z
103	G	118UI	CP032515,CP032517,CP032516	UTI	D	69	81	240	13	27	2	North America	2009	Uropathogenic Escherichia coli complete genome	2018-11-28T21:06:17.012Z
104	G	28Eco12	CP038505,CP038506	UTI	D	38	87	246	19	31	1	South America	2013	Carbapenem resistant clinical isolate	2019-07-14T17:14:27.147Z
105	G	50579417	LNHL00000000	UTI	D	405	85	253	17	38	5	Europe	2012	Carbapenemase-producing Enterobacteriaceae Norway	2016-01-30T18:39:56.002Z
106	G	FDAARGOS_448	CP023960,CP023959,CP023961,CP023957,CP023958	UEc	D	405	89	248	21	33	4	North America	2014	In May 2014, the FDA and collaborators established a publicly available dAtabase for Reference Grade micrObial Sequences called FDA-ARGOS. With funding support from FDA’s Office of Counterterrorism and Emerging Threats (OCET) and DoD, the FDA-ARGOS team are initially collecting and sequencing 2000 microbes that include biothreat microorganisms, common clinical pathogens and closely related specie…	2017-11-24T16:46:04.670Z
107	G	Survcare321	CP076301,CP076302,CP076303,CP076304	UEc	D	405	88	246	20	31	3	Europe	2019	Our study goals to molecular investigation on resistance mechanisms of CMY-42 encoding artreonam and avibactam resistant Eschichia coli.	2021-06-26T02:52:05.435Z
108	G	18070201	CP090074,CP090075,CP090076,CP090077	UTI	D	405	91	265	23	42	3	Asia	2018		2022-04-26T14:53:57.390Z
109	G	103	CP020495,CP020496,CP020497	UEc	D	405	86	237	18	24	2	North America	2015	The goal of this project is to identify carbapenemases and other beta-lactamases in clinical isolates with WGS and assess their mobilization potential . The results can support national surveillance of clinically identified pathogens and provide invaluable information to infection control in hospital.	2019-07-14T16:18:50.091Z
110	G	222		UEc	D	405	100	252	32	37	3	North America	2015		2019-03-24T01:31:19.380Z
111	H	XH992	CP019392,CP019394,CP019395,CP019393	UEc	F	354	106	223	37	10	3	Asia	2016	Escherichia coli	2021-02-27T17:52:56.251Z
112	H	M160133	CP022164,CP022165,CP022166,CP022167	ABU	F	1485	67	254	2	29	3	North America	2016	Escherichia coli harboring mcr-1 on an IncHI2 plasmid in a New York patient returning from Portugal, 2016	2017-07-23T04:28:36.316Z
113	H	201609	CP048107	RUTI	F	648	74	235	6	22	0	Asia	2016	A clinical ESBL, Carbapenemase and MCR-1-producing Escherichia coli ST648 isolate Carrying Three Resistance Plasmids	2020-03-26T18:48:44.911Z
114	H	CLSC36	CP041300,CP041299	UTI	F	648	76	249	8	34	1	North America	2005	This strain was sequenced as part of a study that investigated the activity of the outer membrane protease OmpT among uropathogenic Escherichia coli clinical isolates. Healthy adult with cystitis	2019-09-30T16:44:45.900Z
115	H	EC488	CP109874,CP109875,CP109884,CP109877,CP109878,CP109879,CP109880,CP109881,CP109882,CP109883,CP109876	UEc	F	648	87	243	19	29	10	Asia	2021		2022-11-22T21:14:39.258Z
116	H	MS6198	CP015834,CP015835,CP015836,CP015837,CP015838	UTI	F	648	95	235	27	22	4	Europe		Complete sequencing of carbapenem resistant uropathogenic E. coli strain MS6198	2016-11-16T00:36:02.859Z
117	H	2021CK-00607	CP104665,CP104666,CP104667,CP104668,CP104669,CP104670,CP104671,CP104672,CP104673,CP104674,CP104675,CP104676	UEc	F	648	93	233	25	20	11	North America	2021		2022-10-16T13:05:02.151Z
118	H	MSHS 133	CP041304,CP041303	UTI	G	-	81	234	13	21	1	North America	2005	This strain was sequenced as part of a study that investigated the activity of the outer membrane protease OmpT among uropathogenic Escherichia coli clinical isolates.	2019-09-30T16:44:56.403Z
119	I	EC28	CP049101,CP049102,CP049104,CP049105,CP049106,CP049103	UTI	B2	429	82	225	14	12	5	Asia	2018	Escherichia coli EC28	2020-03-27T14:34:52.498Z
120	I	FDAARGOS_144	CP014111,CP014110,CP014112,CP014109	UTIc	B2	538	76	224	8	11	3	North America	2014	In May 2014, the FDA and collaborators established a publicly available dAtabase for Reference Grade micrObial Sequences called FDA-ARGOS. With funding support from FDA’s Office of Counterterrorism and Emerging Threats (OCET) and DoD, the FDA-ARGOS team are initially collecting and sequencing 2000 microbes that include biothreat microorganisms, common clinical pathogens and closely related specie…	2018-05-26T01:14:33.083Z
121	I	EC32	CP085619,CP085620,CP085621	UEc	B2	-	90	217	22	4	2		2014	EC32 is an E. coli isolated from a tertiary hospital in Guangzhou, which contains an IncI1 plasmid carrying CTX-M-55 gene.	2021-11-30T21:56:20.898Z
122	I	SA186	CP022730,CP022731,CP022732,CP022733,CP022734,CP022735	UTI	B2	131	96	231	28	18	4	Asia	2012	Complete Genome Sequence of Escherichia coli Strain SA186, a Uropathogenic E.coli strain of ST131 Encoding Colistin Resistance Determinant MCR-1	2019-01-30T09:12:09.192Z
123	I	EcPF7	CP054232,CP054233,CP054234,CP054235	UTIc	B2	2279	81	228	13	15	3	North America	2018	Uropathogenic Escherichia coli (UPEC) is the most common cause of urinary tract infection (UTI). This disease disproportionately affects women and frequently develops into recurrent UTI (rUTI) in postmenopausal women. Here we report the complete genome sequences of seven UPEC isolates obtained from the urine of postmenopausal women suffering from rUTI.	2020-07-02T04:19:52.204Z
124	I	Ec55	CP059130,CP059131,CP059132,CP059133,CP059134	UEc	B2	131	89	230	21	17	4	Africa	2016	Our aim of the project is to investigate the current status of antimicrobial resistance among clinical isolates from Ghana, and further to explore major resistance mechanisms involved.	2021-08-26T12:28:08.566Z
125	I	Ec394-330266	CP056114,CP056115,CP056116	UEc	B2	131	92	225	24	12	2	Europe	2019		2022-02-27T05:58:40.895Z
126	I	C31	CP102061,CP102063,CP102064,CP102062	UTI	B2	131	83	231	15	18	3	Asia			2022-09-02T15:21:42.135Z
127	I	UCS1	CP084679	RUTI	B2	131	79	224	11	11	0	North America	2019		2022-02-02T16:12:23.031Z
128	I	UCS1.1	CP084678	ABU	B2	131	80	224	12	11	0	North America	2020		2022-02-02T16:15:35.343Z
129	I	2/0	CP023853,CP023854,CP023855,CP023856,CP023857,CP023858	UTI	B2	131	89	231	21	18	5	Europe	2009	We have followed three patients over the course of one year after an initial urinary tract infection caused by ESBL-producing Enterobacteriaceae. The complete genomes including plasmids were sequenced for isolates 0, 1, 3, 6 and 12 months post UTI.	2019-01-30T09:42:01.476Z
130	I	4/0	CP023849,CP023850,CP023851,CP023852	UTI	B2	131	88	232	20	19	3	Europe	2009	We have followed three patients over the course of one year after an initial urinary tract infection caused by ESBL-producing Enterobacteriaceae. The complete genomes including plasmids were sequenced for isolates 0, 1, 3, 6 and 12 months post UTI.	2019-01-30T09:04:03.475Z
131	I	uk_P46212	CP013658,CP013657	UEc	B2	131	89	228	21	15	1	Europe	2005	ST131 is one of the most common E. coli lineages found in clinical specimens globally. It is frequently associated with antimicrobial resistance to several drug classes, including to fluoroquinolones, aminoglycosides and extended-spectrum cephalosporins. Resistance to extended-spectrum cephalosporins is often attributable to the presence of CTX-M genes encoding extended spectrum beta-lactamases. …	2016-01-31T09:05:39.835Z
132	I	S65EC	CP036245,CP036244	UEc	-	-	80	228	12	15	1	Oceania	2009	Uropathogenic E. coli (UPEC) is the major causative pathogen for urinary tract infections. Nearly half of UPEC express hemolysin A, and hemolysin expression is associated with pyelonephritis and urosepsis strains, which indicated its link to increased virulence in UPEC. In this study, we analysed hemolysin production in ST131, and investigated the genes involved in hemolysin production and activi…	2019-07-14T15:03:11.308Z
133	I	55989	CP028304	UTI	B2	131	77	217	9	4	0	Asia	2016	To find out antibiotic resistant genes, De novo mutations, presence of bacteriophage in genome, phylogenetic tree of uropathogens and correlation b/w different phylogentic groups and antibiotic resistance of clinical isolates. Investigating the potential of Lactic acid bacteria to replace antibiotic for treatment of UTI;missing ribosomal protein genes;missing tRNA genes	2018-05-30T23:17:51.825Z
134	I	1162C	CP051659,CP051660	RUTI	B2	131	76	222	8	9	1	North America	2012		2022-01-28T21:26:03.442Z
135	I	1162T7	CP051661,CP051662	RUTI	B2	131	75	226	7	13	1	North America	2011		2022-01-28T21:25:48.218Z
136	I	1162invT2	CP051663,CP051664,CP051665	RUTI	B2	131	86	227	18	14	2	North America	2010		2022-01-28T21:25:52.926Z
137	I	EcPF18	CP054219,CP054220,CP054221,CP054222,CP054223	UTIc	B2	131	77	226	9	13	4	North America	2018	Uropathogenic Escherichia coli (UPEC) is the most common cause of urinary tract infection (UTI). This disease disproportionately affects women and frequently develops into recurrent UTI (rUTI) in postmenopausal women. Here we report the complete genome sequences of seven UPEC isolates obtained from the urine of postmenopausal women suffering from rUTI.	2020-07-02T04:13:10.509Z
138	I	BR43-DEC	CP035377,CP035378,CP035379	UTI	B2	131	79	229	11	16	2	South America	2015	11 uropathogenic Escherichia coli genomes isolated in "Hospital da Clinicas de Botucatu", Sao Paulo - Brazil	2019-07-14T13:02:46.123Z
139	I	U14A	CP035516,CP035517,CP035518,CP035519,CP035520,CP035521,CP035522	RUTI	B2	131	86	229	18	16	6	North America	2015	Recurrent urinary tract infections (rUTI) are extremely common, with ~25% of all women who suffer an initial UTI experiencing a recurrence within one year of the original infection. rUTI often occurs when bacteria from the initial infection persist after treatment. Escherichia coli ST131 is a major contributor to hospital and community acquired UTI and is strongly associated with limited treatmen…	2019-07-14T13:16:51.583Z
140	I	U15A	CP035720,CP035721,CP035722,CP035723,CP035724,CP035725,CP035726	RUTI	B2	131	86	221	18	8	6	North America	2015	Recurrent urinary tract infections (rUTI) are extremely common, with ~25% of all women who suffer an initial UTI experiencing a recurrence within one year of the original infection. rUTI often occurs when bacteria from the initial infection persist after treatment. Escherichia coli ST131 is a major contributor to hospital and community acquired UTI and is strongly associated with limited treatmen…	2019-07-14T14:23:18.347Z
141	I	U12A	CP035476,CP035468,CP035469,CP035470,CP035471,CP035472,CP035473,CP035474,CP035475	RUTI	B2	131	87	228	19	15	8	North America	2012	Recurrent urinary tract infections (rUTI) are extremely common, with ~25% of all women who suffer an initial UTI experiencing a recurrence within one year of the original infection. rUTI often occurs when bacteria from the initial infection persist after treatment. Escherichia coli ST131 is a major contributor to hospital and community acquired UTI and is strongly associated with limited treatmen…	2019-07-14T13:20:27.628Z
142	I	U13A	CP035477,CP035478,CP035479,CP035480,CP035481,CP035482,CP035483	RUTI	B2	131	86	229	18	16	6	North America	2013	Recurrent urinary tract infections (rUTI) are extremely common, with ~25% of all women who suffer an initial UTI experiencing a recurrence within one year of the original infection. rUTI often occurs when bacteria from the initial infection persist after treatment. Escherichia coli ST131 is a major contributor to hospital and community acquired UTI and is strongly associated with limited treatmen…	2019-07-14T13:15:10.005Z
143	I	THO-015	AP022549,AP022550,AP022551,AP022552	UEc	B2	131	88	224	20	11	3	Asia	2018	This project is related to metagenomic survey and genomic epidemiology analysis of antimicrobial resistance bacteria (in particular, carbapenem and/or beta-lactam resistant Enterobacteriaceae) in Japanese hospital sewage.	2020-11-30T01:09:08.140Z
144	I	81009	CP021179,CP021180	UEc	B2	131	67	264	2	41	1	Asia	2009	Finished quality genome assembly of Escherichia coli 81009, an ST131-O25b:H4 prototype with multi-drug resistance phenotype	2017-07-21T20:56:47.486Z
145	I	83972	CP058220,CP058221	ABU	B2	73	76	233	8	20	1	Europe	1973		2022-02-27T05:59:03.270Z
146	I	EcPF14	CP054230,CP054231	UTIc	B2	73	77	224	9	11	1	North America	2018	Uropathogenic Escherichia coli (UPEC) is the most common cause of urinary tract infection (UTI). This disease disproportionately affects women and frequently develops into recurrent UTI (rUTI) in postmenopausal women. Here we report the complete genome sequences of seven UPEC isolates obtained from the urine of postmenopausal women suffering from rUTI.	2020-07-02T04:15:28.522Z
147	I	UPEC 26-1	CP016497,CP016498	UTI	B2	73	82	235	14	22	1	Asia	2012	Uropathogenic Escherichia coli (UPEC) are the primary causative of urinary tract infections (UTIs) worldwide. We isolated the strain, UPEC 26-1 from a patient suffering from UTI. The whole genome analysis of the isolate will provide information that will drive further study of UPEC to elucidate the vital factors responsible to cause disease.	2016-08-27T02:19:41.307Z
148	I	UPEC_U013	CP058596	UTI	B2	73	76	225	8	12	0	Asia	2014	A clinical isolate of uropathogenic Escherichia coli carrying a colibactin-producing gene cluster in its genome	2020-11-28T10:52:33.711Z
149	I	EcPF5	CP054236,CP054237,CP054238	UTIc	B2	73	85	236	17	23	2	North America	2018	Uropathogenic Escherichia coli (UPEC) is the most common cause of urinary tract infection (UTI). This disease disproportionately affects women and frequently develops into recurrent UTI (rUTI) in postmenopausal women. Here we report the complete genome sequences of seven UPEC isolates obtained from the urine of postmenopausal women suffering from rUTI.	2020-07-02T04:15:23.840Z
150	I	CFT073	CP058222	UTI	B2	73	75	232	7	19	0	North America	1990		2022-02-27T05:58:25.930Z
151	I	SCAID URN1-2019	CP052057	UTIc	B2	998	73	241	5	28	0	Asia	2019	Creating experimental models on the basis of clinical isolates that are characterized by multiple drug resistance, in order to clarify the universality of the reversion phenomenon	2020-06-04T01:37:37.193Z
152	I	NU14	CP019777	UTI	B2	95	75	228	7	15	0		1986	Sequencing of uropathogenic E. coli strain NU14	2017-03-20T09:03:42.395Z
153	I	UTI89	CP062228	UTI	B2	95	75	226	7	13	0	Asia	2018	Uropathogenic e.coli will cause urinary tract infection which one major nosocomial infection. In our observation UTI89 strain shown heterogen colonies regarding the biofilm formation. If we can understand the interaction between these variants will give some insight to the treatment.	2020-11-29T06:14:35.959Z
154	I	UPEC129	CP071522,CP071523,CP071524	UTI	B2	95	77	220	9	7	2	Asia	2011	We analyzed the genome sequences E. coli strains originating from human and bovine hosts in order to provide insights into the acquisition of the pks island in the E. coli population.	2021-03-28T02:01:35.863Z
155	I	S88	CU928161,CU928146	NMEC	B2	95	76	238	8	25	1
156	I	MS7163	CP026853,CP026854,CP026855	UTI	B2	95	81	235	13	22	2	Europe		Uropathogenic Escherichia coli (UPEC) are the most common cause of urinary tract infection. Curli are extracellular amyloid fibres that enhance UPEC virulence by their capacity to mediate adhesion and biofilm formation. In this study, we examined the function and regulation of curli in the UPEC pyelonephritis strain MS7163 that expressed these fibres at human physiological temperature. We also pe…	2018-05-31T00:19:15.799Z
157	I	16843	CP113503	UTIc	B2	127	80	229	12	16	0	Europe	2017		2022-12-26T22:15:44.840Z
158	I	Combat2C1	CP019243,CP019244	UTI	B2	127	77	226	9	13	1	Asia	2004	oqxAB positive Escherichia coli Genome sequencing and assembly	2019-09-29T18:44:00.879Z
159	I	EC_01	CP120234,CP120235	UTI	B2	127	82	226	14	13	1	Europe	2022		2023-04-21T00:18:06.213Z
160	I	F11	CP076123,CP076124	UTI	B2	127	75	226	7	13	1			Extra-intestinal pathogenic Escherichia coli (ExPEC) are members of a critical priority group of antibiotic resistant pathogens that cause severe human disease. ExPEC produce multiple virulence factors that contribute to host colonisation and infection, including adhesins from the chaperone-usher fimbriae class. ExPEC Ucl fimbriae mediate attachment to human exfoliated uroepithelial cells, biofil…	2021-06-26T02:43:16.753Z
161	I	BH100 substr. MG2014	CP024650,CP024651,CP024652	UTI	B2	127	91	236	23	23	2	South America	1974	Escherichia coli BH100 was isolated from a patient with urinary tract infection in Belo Horizonte, Brazil.	2017-11-24T17:24:09.238Z
162	I	BH100L substr. MG2017	CP025716	UTI	B2	127	74	217	6	4	0	South America	1974	Escherichia coli BH100 was isolated from a patient with urinary tract infection in Belo Horizonte, Brazil.	2018-05-25T18:51:26.538Z
163	I	BH100N substr. MG2017	CP025703	UTI	B2	127	72	219	4	6	0	South America	1974	Escherichia coli BH100 was isolated from a patient with urinary tract infection in Belo Horizonte, Brazil.	2018-05-25T20:12:16.671Z
164	I	K56-43-un	CP053079	UTI	B2	537	75	217	7	4	0	Europe	2007	Evolution, selection, and spread of antibiotic resistance.	2020-07-28T06:51:36.564Z
165	I	EC8	CP060953,CP060962,CP060955,CP060956,CP060957,CP060958,CP060959,CP060960,CP060961,CP060954	UEc	B2	1193	101	237	33	24	9	Asia	2016		2022-03-23T23:55:12.219Z
166	I	XYEH3783	CP110996,CP110997,CP110998	UEc	B2	1193	90	243	22	29	2	Asia	2021		2022-12-26T16:10:20.564Z
167	I	BR14-DEC	CP035330	UTI	B2	1193	79	238	11	25	0	South America	2015	11 uropathogenic Escherichia coli genomes isolated in "Hospital da Clinicas de Botucatu", Sao Paulo - Brazil	2019-07-14T12:59:28.451Z
168	I	UPEC-774U/190308	CP049852,CP049856,CP049855,CP049854,CP049853	RUTI	B2	1193	84	234	16	21	4	North America	2019	Genome sequences of E.coli producing recurrent infections	2021-08-26T15:09:45.907Z
169	I	UPEC-455U/190220	CP049839,CP049843,CP049842,CP049841,CP049844,CP049840	RUTI	B2	1193	80	235	12	22	4	North America	2019	Genome sequences of E.coli producing recurrent infections	2021-08-26T15:09:17.593Z
170	I	DS566	CP092534	UTI	B2	1193	75	230	7	17	0	North America	2020		2022-07-30T13:21:17.660Z
171	I	EcPF40	CP054214,CP054215,CP054216,CP054217,CP054218	UTIc	B2	1193	84	233	16	20	4	North America	2019	Uropathogenic Escherichia coli (UPEC) is the most common cause of urinary tract infection (UTI). This disease disproportionately affects women and frequently develops into recurrent UTI (rUTI) in postmenopausal women. Here we report the complete genome sequences of seven UPEC isolates obtained from the urine of postmenopausal women suffering from rUTI.	2020-07-02T04:13:00.471Z
